# Supplementary material
Source: PubMed Central journal article supplement (PMC2923265)

## BrdU pulse-chasing paradigm

[BrdU, 50 mg/kg, i.p., 1 or 4 (hours apart) injections, surviving times, animal number and groups]

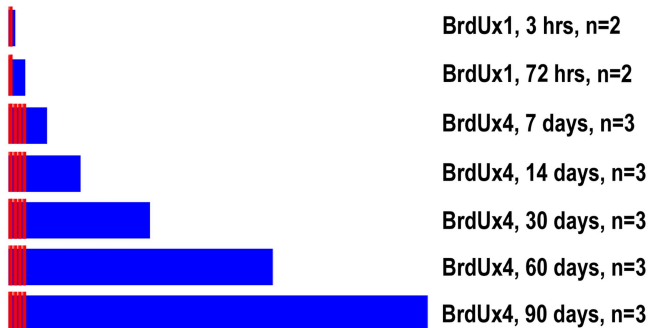

## Unilateral cranial radiation paradigm

(dosage/timing, surviving periods, animal number and groups)

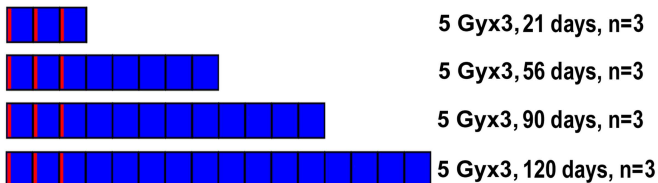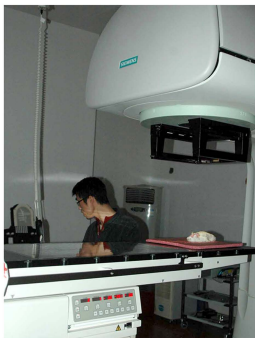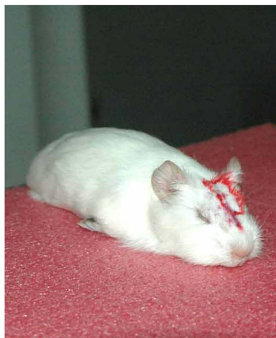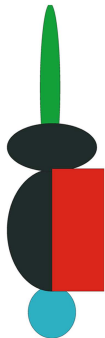

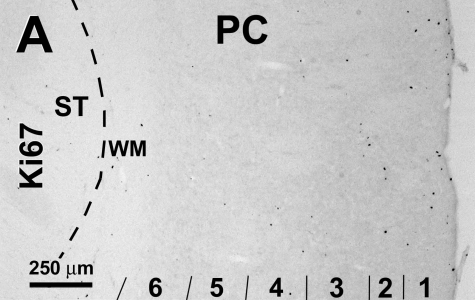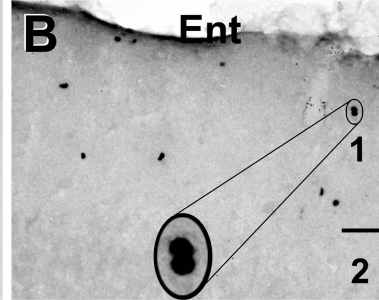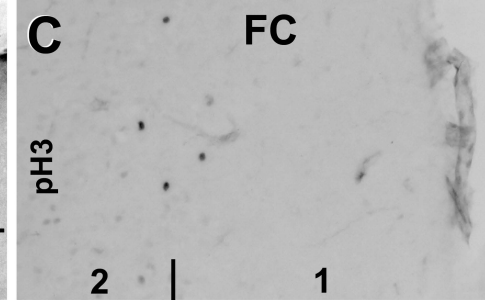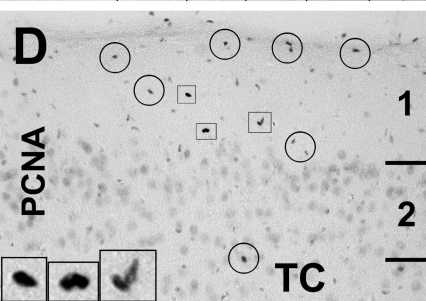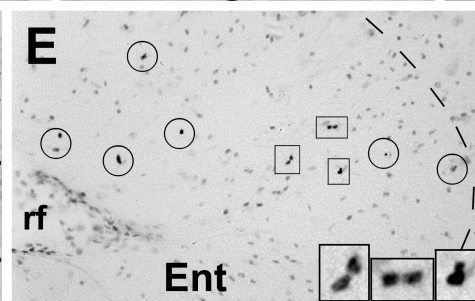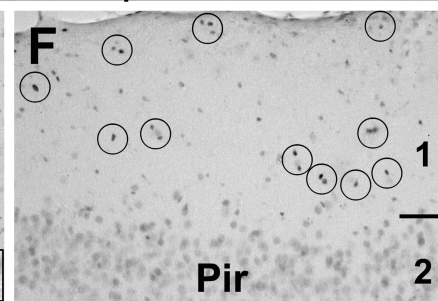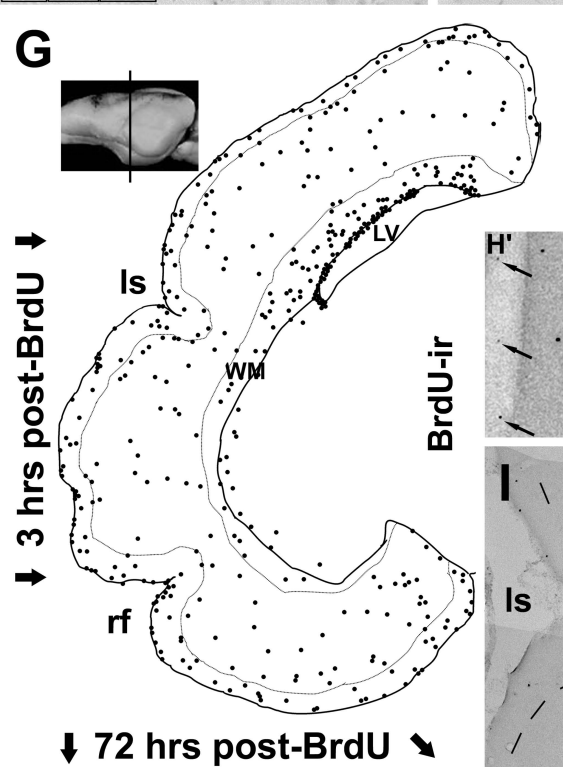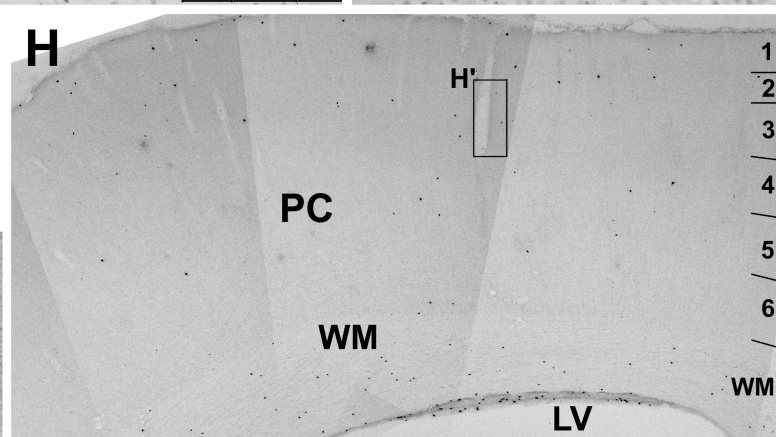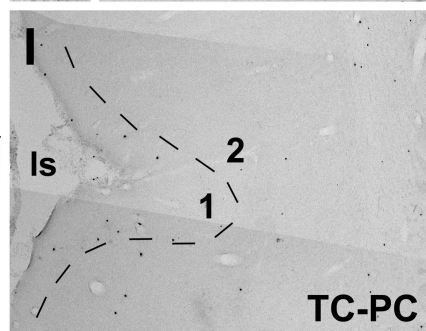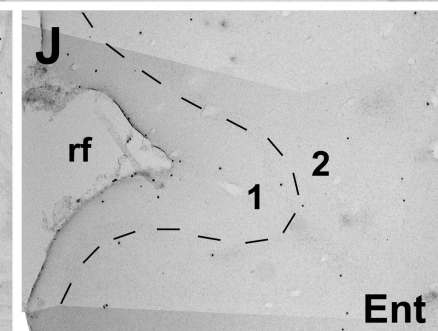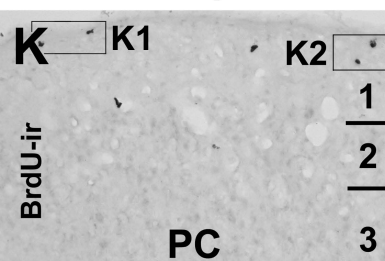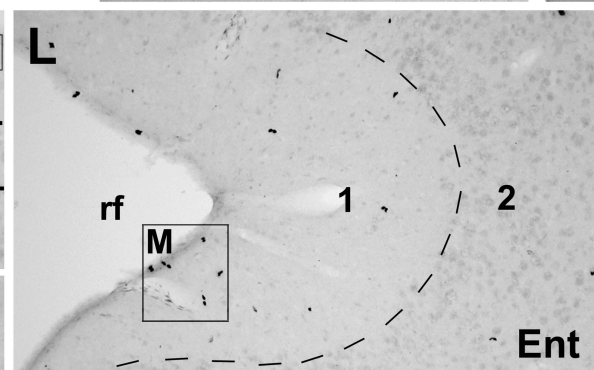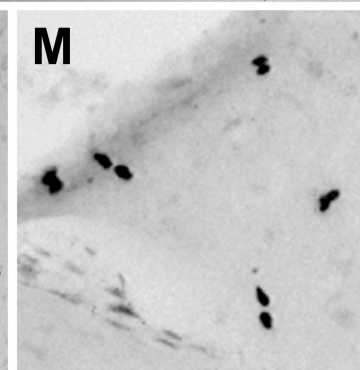

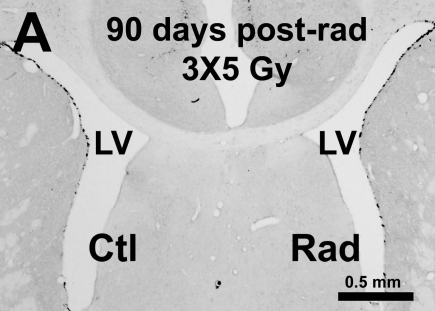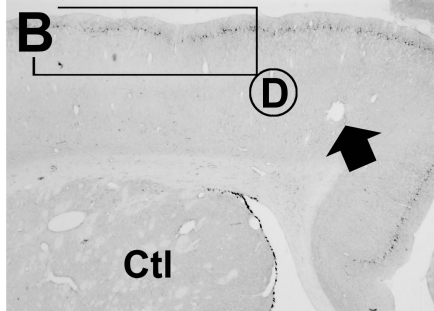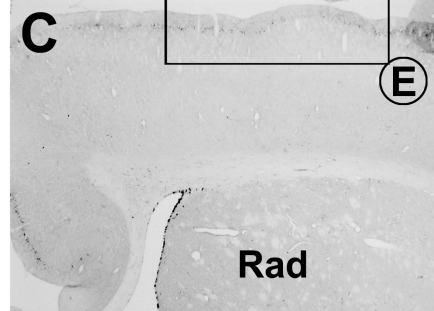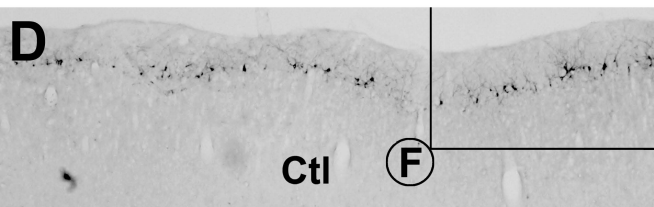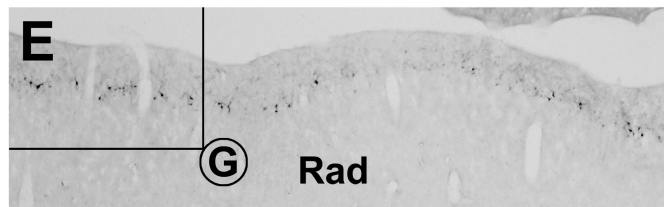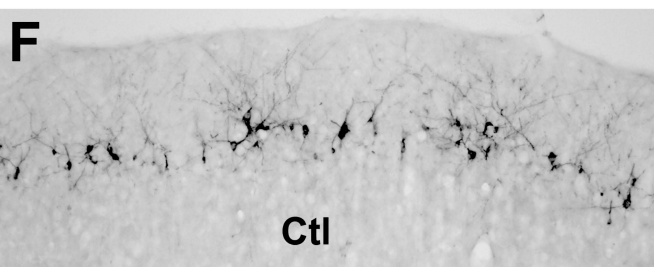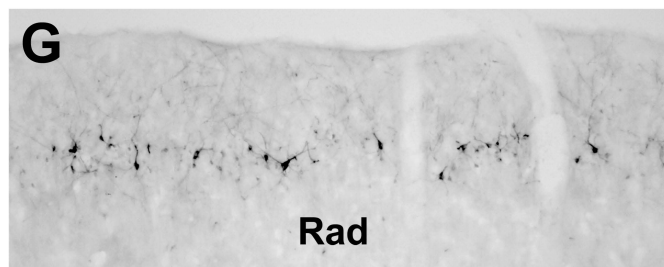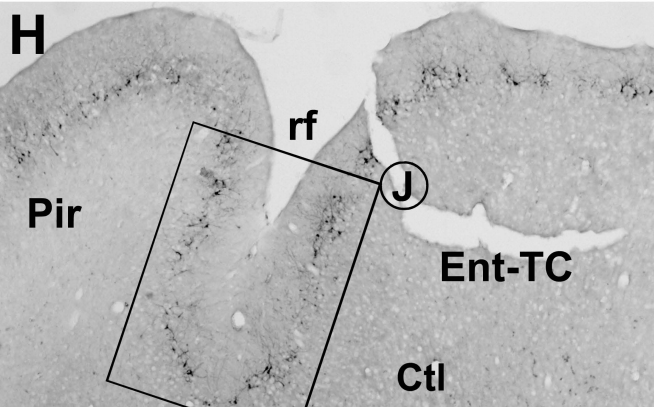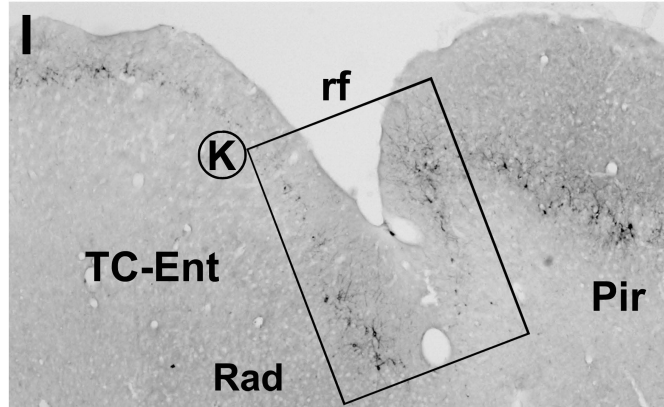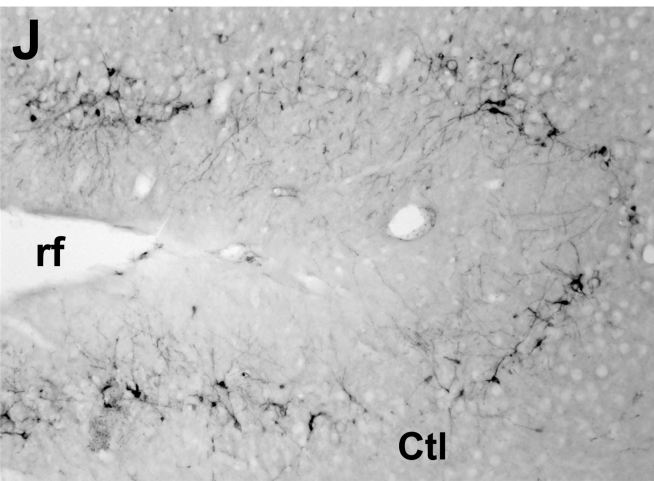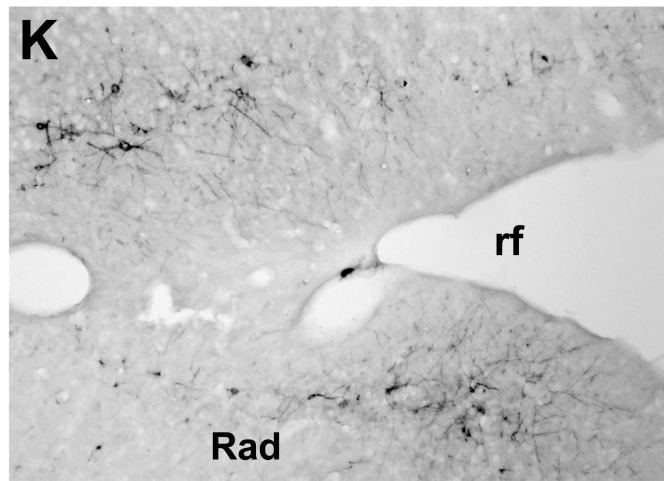

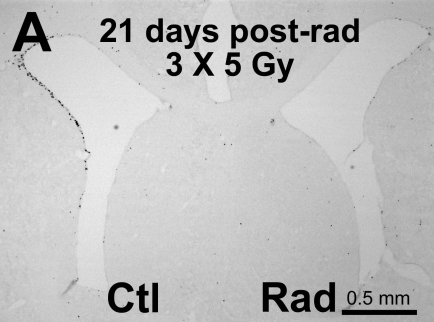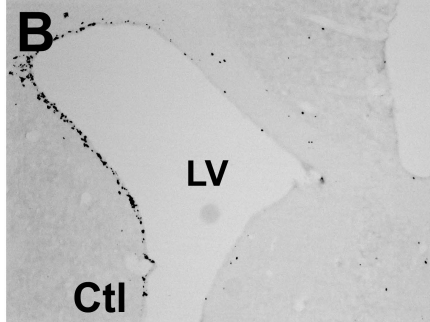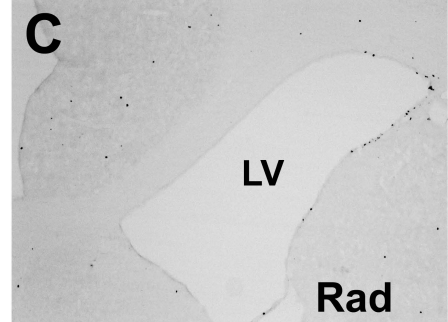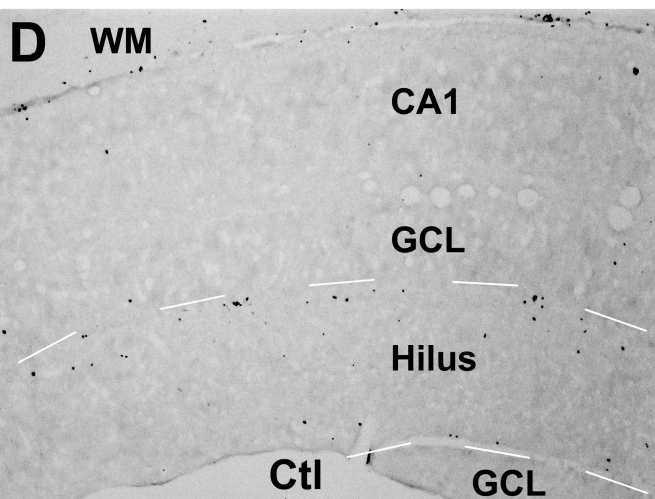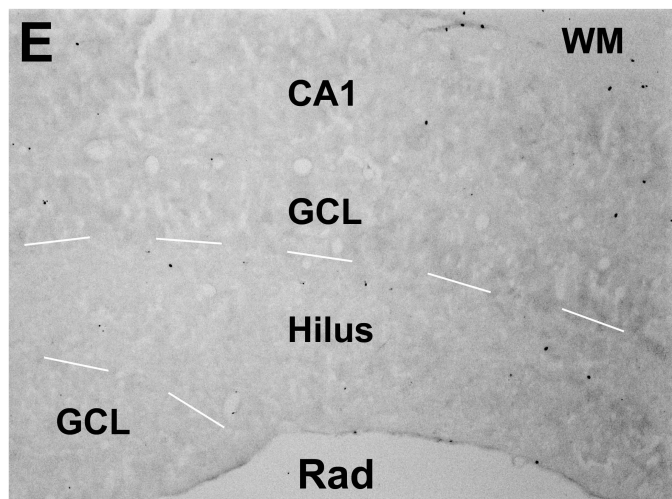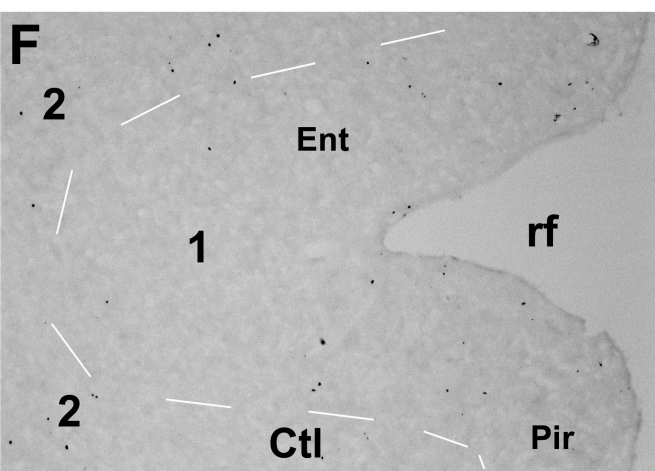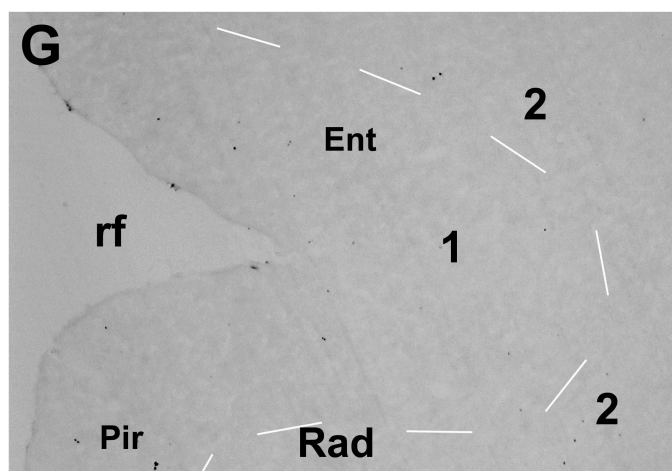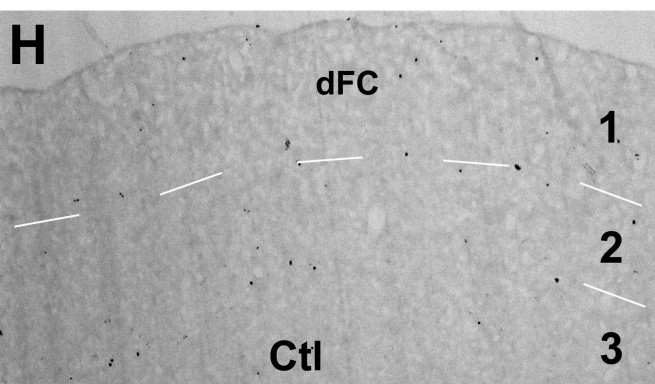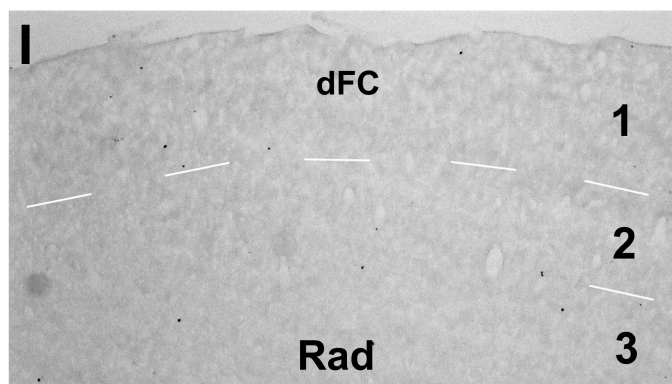

Supplement: NIHMS216034-supplement-Suppl-Figures-1-4.pdf [file NIHMS216034-supplement-Suppl-Figures-1-4.pdf]
